# Supplementary material for: Sequential Metabolic Phases as a Means to Optimize Cellular Output in a Constant Environment
Source: PLOS journal article supplement (doi:10.1371/journal.pone.0118347), 2015-03-18
Supplement: S7 (10.1371/journal.pone.0118347.s007) [file journal.pone.0118347.s007]

# Sequential Metabolic Phases as a Means to Optimize Cellular Output in a Constant Environment

Aljoscha Palinkas, Sascha Bulik, Alexander Bockmayr, Hermann-Georg Holzhütter

## Supplementary Information

### Analysis of the minimal example

The simplicity of the minimal example allows us to analyze formally how the parameters determine the performance of the different strategies.

**Strategy A: Single flux mode** For strategy A, the reference case, the demanded output  $\Gamma > 0$  is produced by a single flux mode  $v$ . Without loss of generality, we assume  $\tau v_1 = \Gamma_1, \tau v_2 = \Gamma_2$  and set  $r := \Gamma_2/\Gamma_1 = v_2/v_1$ . Using the steady-state assumption  $v_0 = v_1 + v_2$ , we obtain  $v^\top = (v_0, v_1, v_2)^\top = v_1 \cdot (1 + r, 1, r)^\top$  (again  $\cdot^\top$  denotes transposition). Thus, there is only the unknown  $v_1$ , which has to be maximized in order to minimize  $\tau(1) = \Gamma_1/v_1$ . From  $v > 0$ , we get  $g = (1, 1, 1)^\top$ . Setting the kinetic parameters to  $\eta_j = 1, j = 1, 2, 3$ , the upper bounds on the fluxes (cf. 6) are given by

$$ub_j := A_{tot} kc_j \frac{1}{\gamma_A + g \cdot \gamma} = A_{tot} kc_j \frac{1}{\gamma_A + \gamma_0 + \gamma_1 + \gamma_2}, \text{ for } j = 0, 1, 2.$$

Maximizing  $v_1$  under the constraint  $v \leq ub$ , we obtain  $v_1 = \min(ub_0/(1 + r), ub_1, ub_2/r)$  or equivalently

$$\tau(1) = \frac{\Gamma_1}{v_1} = \max \left( \frac{\Gamma_1 + \Gamma_2}{ub_0}, \frac{\Gamma_1}{ub_1}, \frac{\Gamma_2}{ub_2} \right). \quad (S1)$$

**Strategy B: Switching between two MinModes** Next we consider the case where the two minimal gene sets  $\chi_1, \chi_2$  are separately activated in two time intervals with flux vectors  $w^1, w^2$ . Here  $w^1$  is only producing the target metabolite  $P_1$  and  $w^2$  only  $P_2$ . Applying the steady-state condition, we get  $w^1 = (w_0^1, w_1^1, 0)^\top, w^2 = (w_0^2, 0, w_2^2)^\top$ . For  $w^1$ , we have the upper bounds

$$ub_0^1 := A_{tot} kc_0 \frac{1}{\gamma_A + \gamma_0 + \gamma_1}, \quad ub_1^1 := A_{tot} kc_1 \frac{1}{\gamma_A + \gamma_0 + \gamma_1}, \quad ub_2^1 = 0,$$

whereas as for  $w^2$  we get

$$ub_0^2 := A_{tot} kc_0 \frac{1}{\gamma_A + \gamma_0 + \gamma_2}, \quad ub_1^2 = 0, \quad ub_2^2 := A_{tot} kc_2 \frac{1}{\gamma_A + \gamma_0 + \gamma_2}.$$

Maximizing  $w_0^1$  resp.  $w_0^2$  under the constraint  $w^1 \leq ub^1$  resp.  $w^2 \leq ub^2$  yields

$$w^1 = \min(ub_0^1, ub_1^1) \begin{pmatrix} 1 \\ 1 \\ 0 \end{pmatrix} \text{ and } w^2 = \min(ub_0^2, ub_2^2) \begin{pmatrix} 1 \\ 0 \\ 1 \end{pmatrix}.$$

For the durations, we get

$$\tau_1 = \frac{\Gamma_1}{\min(ub_0^1, ub_1^1)} = \max\left(\frac{\Gamma_1}{ub_0^1}, \frac{\Gamma_1}{ub_1^1}\right) \text{ and } \tau_2 = \frac{\Gamma_2}{\min(ub_0^2, ub_2^2)} = \max\left(\frac{\Gamma_2}{ub_0^2}, \frac{\Gamma_2}{ub_2^2}\right). \quad (\text{S2})$$

Whether or not the solution  $w^1$  and  $w^2$  outperforms the single flux vector  $v$ , i.e., whether or not  $\tau_1 + \tau_2 < \tau(1)$  depends on the demand  $\Gamma$  and the upper bounds  $ub, ub^1, ub^2$ . We discuss two cases in more detail.

First suppose  $ub_0$  is small, such that  $\tau(1) = (\Gamma_1 + \Gamma_2)/ub_0$  and  $ub_0 < ub_1^1, ub_2^2$ . It follows  $\tau_1 < \Gamma_1/ub_0$ ,  $\tau_2 < \Gamma_2/ub_0$  and so  $\tau_1 + \tau_2 < \tau(1)$ . In other words, switching from  $w^1$  to  $w^2$  is more efficient than the single flux mode  $v$ .

Second, assume  $ub_0$  is large, such that  $\tau(1) = \Gamma_1/ub_1 \geq \Gamma_2/ub_2$ . Using Eqn. ??, we get  $(\Gamma_1 + \Gamma_2)/ub_0 \leq \Gamma_i/ub_i$ , which implies  $\Gamma_i/ub_0 \leq \Gamma_i/ub_i$ , for  $i = 1, 2$ . Since  $ub_0 \geq ub_i \Leftrightarrow ub_0^i \geq ub_i^i$  and using Eqn. ??, we get  $\tau_i = \Gamma_i/ub_i^i$ , for  $i = 1, 2$ . The switching solution thus has the duration  $\tau_1 + \tau_2 = \Gamma_1/ub_1^1 + \Gamma_2/ub_2^2$ . As long as  $\Gamma_2/ub_2^2$  is not too small, this will be larger than  $\tau(1) = \Gamma_1/ub_1$ , the duration of the single mode solution. Taking a closer look at the ratio  $\Gamma_1/\Gamma_2$ , we observe that a smaller value of  $\Gamma_1$  and a larger value of  $\Gamma_2$  in this situation are favorable for the the single mode solution. On the one hand, increasing  $\Gamma_1$  by a factor  $c > 1$  increases also  $\tau(1)$  by  $c$ , whereas  $\tau_1 + \tau_2$  increases by a strictly smaller factor (as long as  $\Gamma_2 > 0$ ). On the other hand, decreasing  $\Gamma_2$  has no effect on  $\tau(1)$ , while the duration of the switching solution is decreased. We conclude that the single mode solution performs best compared to the switching solution, i.e.,  $\tau(1)/(\tau_1 + \tau_2)$  is minimal, if we have equality in our assumption, i.e.,  $\Gamma_1/ub_1 = \Gamma_2/ub_2$ , or equivalently  $\Gamma_1/\Gamma_2 = ub_1/ub_2$ .

**Strategies C or D** Between the two extreme strategies A and B, there are the intermediate strategies C and D. Strategy A can be seen as the limit case of strategy C or D, when  $\tau_2$  goes to zero. Strategy B is a limit case of C resp. D, when  $v_1^2$  resp  $v_1^2$  vanishes.
